# Supplementary material for: Regulation of DNA Replication through Natural Impediments in the Eukaryotic Genome
Source: Genes (Basel). 2017 Mar 7;8(3):98. doi: 10.3390/genes8030098 (PMC5368702; doi:10.3390/genes8030098)
Supplement: Supplementary file 1 [file genes-08-00098-s001.xlsx]

## Sheet: Sheet1
Supplementary Table S1. Replication barriers in human, S. pombe, and S. cerevisiae genomes.
HUMAN
genome region	barrier	replication impediments	barrier directionality	replisome factors	sequence-specific factors
telomere		repetitive DNA sequence		Timeless (FPC)	TRF1
		heterochromatin
		shelterin complex
		T-loop structure
		G-quadruplexes		RTEL and BLM	TRF1-related proteins
rDNA repeats	SAL boxes	repetitive DNA	bidirectional	Timeless-Tipin (FPC), Claspin?	TFF-1
centromeres		repetitive α satellite			CENP-A
		H3 lysine 9 di/tri-methylation and H3 lysine 4 mono-methylation
repetitive DNA and secondary structures	G-quadruplexes , etc			FANCJ, WRN, and BLM
S POMBE
genome region	barrier	replication impediments	barrier directionality	replisome factors	sequence-specific factors
telomere		repetitive DNA sequence		Swi1 (FPC)	Taz1
		heterochromatin
		shelterin complex
		T-loop structure
		G-quadruplexes			Pfh1
rDNA repeats	Ter1/RFB1,	repetitive DNA	polar	Swi1-Swi3 (FPC), Mrc1, Dcr1, Lsd1, and Lsd2	Sap1
	Ter2/RFB2,		polar	Swi1-Swi3 (FPC), Mrc1, Dcr1, Lsd1, and Lsd2	Reb1
	Ter3/RFB3		polar	Swi1-Swi3 (FPC), Mrc1, Dcr1, Lsd1, and Lsd2	Reb1
	RFP4		polar (non functional)
centromere	tRNA genes	repetitive DNA sequences and heterochromatin marks	polar?	RNAi machinery	CENP-B
tRNA genes	tRNA genes	RNA Pol III promoter elements	polar
Tf1 LTR retrotransposons					Sap1
Tf2 LTR transposons			polar		Sap1, Abp1, and Cbh1
mating-type locus	MPS1		polar (pausing not stalling)	Swi1-Swi3 (FPC), Lsd1, and Lsd2
	RTS1		polar	Swi1-Swi3 (FPC), Lsd1, and Lsd2	Rtf1
repetitive DNA and secondary structures	G-quadruplexes , etc			Pfh1
S CEREVISIAE
genome region	barrier	replication impediment	barrier directionality	replisome factors	sequence-specific factors
telomere	unknown	repetitive DNA sequence	stalling independent of repeat orientation	Tof1 (FPC)	Rap1
		heterochromatin
		Rap1
		G-quadruplexes		Rrm3 (aliviates pausing)	Pif1
rDNA repeats	RFB sites	repetitive DNA	polar	Tof1-Csm3 (FPC)	FOB1
				Mrc1?
				Rrm3 (aliviates pausing)
centromere	CDEIII	repetitive DNA	pausing not stalling - bidirectional	Tof1 (FPC)	CBF3
trna genes	trna genes	active transcription required for barrier activity	polar	Tof1 (FPC) and Rrm3	TFIIIC complex
Ty1-LTR			polar
repetitive DNA and secondary structures	G-quadruplexes , etc			Pif1-related helicases
